Exams are available online only at [cme.psychiatryonline.org](http://cme.psychiatryonline.org)

## INFORMATION TO PARTICIPANTS

**OBJECTIVES.** After evaluating a specific journal article published in the American Journal of Psychiatry, participants should be able to demonstrate an increase in their knowledge of clinical medicine. Participants should be able to understand the contents of a selected research or review article and to apply the new findings to their clinical practice.

**PARTICIPANTS.** This program is designed for all psychiatrists in clinical practice, residents in Graduate Medical Education programs, medical students interested in psychiatry, and other physicians who wish to advance their current knowledge of clinical medicine.

**EXPLANATION OF HOW PHYSICIANS CAN PARTICIPATE AND EARN CREDIT.** In order to earn CME credit, subscribers should read through

the material presented in the article. After reading the article, complete the CME quiz online at [cme.psychiatryonline.org](http://cme.psychiatryonline.org) and submit your evaluation and study hours (up to 1 *AMA PRA Category 1 Credit™*).

**CREDITS.** The APA designates this educational activity for a maximum of 1 *AMA PRA Category 1 Credit™*. Physicians should only claim credit commensurate with the extent of their participation in the activity. The American Psychiatric Association (APA) is accredited by the Accreditation Council for Continuing Medical Education (ACCME) to provide continuing medical education (CME) for physicians.

**Estimated Time to Complete: 1 Hour**

Begin date November 1, 2008 – End date October 31, 2010

## EXAMINATION QUESTIONS

Select the single best answer for each question below.

### Does Bereavement-Related Major Depression Differ From Major Depression Associated With Other Stressful Life Events?

Kenneth S. Kendler et al.

Am J Psychiatry 2008; 165:1449–1455

**QUESTION 1.** When criteria for “normal grief” were applied to patients with depression that was bereavement-related and to patients whose depression was related to other stressful life events, how did the two groups of patients compare?

- A. Approximately equal numbers in each group met criteria for normal grief.
- B. A much greater proportion of bereavement-related depression cases met criteria for normal grief.
- C. A much greater proportion of depression related to other stressful events met criteria for normal grief.
- D. Too few subjects in either group met criteria for normal grief to be meaningfully analyzed.

**QUESTION 2.** In comparing cases of bereavement-related depression to cases of depression related to other stressful events, which of the following was observed?

- A. The differences between the two groups of cases substantially outweighed their similarities.
- B. The results were too inconclusive to draw any inferences about similarities or differences.
- C. Similarities between the two groups of cases far outweighed their differences.
- D. Bereavement-related depression was the much more severe disorder of the two groups.

**QUESTION 3.** This study tested the hypothesis that individuals who had bereavement-related depression with features of normal grief were sufficiently distinct so that they should not be diagnosed as major depression. The study reached which of the following conclusions regarding these cases?

- A. They differed substantially from all other depressed subjects on nearly all characteristics.
- B. They differed substantially from other depressed subjects only in the pattern of comorbidity.
- C. They differed substantially from all other depressed subjects only in their personality traits.
- D. No consistent evidence was found to support that they differed substantially from other depressed subjects.

## EVALUATION QUESTIONS

This evaluation form is adapted from the MedBiquitous Journal-Based Continuing Education Guidelines 28 November 2005.

This evaluation will appear online at the end of each CME course. Participants must complete this evaluation in order to receive credit. Select the response which best indicates your reaction to the following statements about this activity.

**STATEMENT 1.** The activity achieved its stated objectives.

- 1. Strongly agree
- 2. Agree
- 3. Neutral
- 4. Disagree
- 5. Strongly disagree

**STATEMENT 2.** The activity was relevant to my practice.

- 1. Strongly agree
- 2. Agree
- 3. Neutral
- 4. Disagree
- 5. Strongly disagree

**STATEMENT 3.** I plan to change my current practice based on what I learned in the activity.

- 1. Strongly agree
- 2. Agree
- 3. Neutral
- 4. Disagree
- 5. Strongly disagree

**STATEMENT 4.** The activity validated my current practice.

- 1. Strongly agree
- 2. Agree
- 3. Neutral
- 4. Disagree
- 5. Strongly disagree

**STATEMENT 5.** The activity provided sufficient scientific evidence to support the content presented.

- 1. Strongly agree
- 2. Agree
- 3. Neutral
- 4. Disagree
- 5. Strongly disagree

**STATEMENT 6.** The activity was free of commercial bias toward a particular product or company.

- 1. Strongly agree
- 2. Agree
- 3. Neutral
- 4. Disagree
- 5. Strongly disagree

## Continuing Medical Education

Exams are available online only at [cme.psychiatryonline.org](http://cme.psychiatryonline.org)

### INFORMATION TO PARTICIPANTS

**OBJECTIVES.** After evaluating a specific journal article published in the American Journal of Psychiatry, participants should be able to demonstrate an increase in their knowledge of clinical medicine. Participants should be able to understand the contents of a selected research or review article and to apply the new findings to their clinical practice.

**PARTICIPANTS.** This program is designed for all psychiatrists in clinical practice, residents in Graduate Medical Education programs, medical students interested in psychiatry, and other physicians who wish to advance their current knowledge of clinical medicine.

**EXPLANATION OF HOW PHYSICIANS CAN PARTICIPATE AND EARN CREDIT.** In order to earn CME credit, subscribers should read through

the material presented in the article. After reading the article, complete the CME quiz online at [cme.psychiatryonline.org](http://cme.psychiatryonline.org) and submit your evaluation and study hours (up to 1 *AMA PRA Category 1 Credit™*).

**CREDITS.** The APA designates this educational activity for a maximum of 1 *AMA PRA Category 1 Credit™*. Physicians should only claim credit commensurate with the extent of their participation in the activity. The American Psychiatric Association (APA) is accredited by the Accreditation Council for Continuing Medical Education (ACCME) to provide continuing medical education (CME) for physicians.

**Estimated Time to Complete: 1 Hour**

Begin date November 1, 2008 – End date October 31, 2010

### EXAMINATION QUESTIONS

Select the single best answer for each question below.

#### Refining the Construct of Narcissistic Personality Disorder: Diagnostic Criteria and Subtypes

Eric Russ et al.

Am J Psychiatry 2008; 165:1473–1481

**QUESTION 1.** Results of this article suggest that the current DSM-IV narcissistic personality disorder criteria are which of the following?

- A. too broad
- B. too narrow
- C. insufficiently detailed
- D. highly accurate

**QUESTION 2.** Which of the following is a characteristic of the grandiose/malignant subtype of narcissistic personality disorder identified in this study?

- A. exhibitionistic behaviors
- B. feelings of inadequacy
- C. negative affect
- D. seething anger

**QUESTION 3.** The fragile narcissism subtype of narcissistic personality disorder identified in this study is characterized by which of the following?

- A. feelings of smallness and inadequacy
- B. interpersonal manipulativeness and power-seeking
- C. seething anger
- D. sexual exhibitionism

### EVALUATION QUESTIONS

This evaluation form is adapted from the MedBiquitous Journal-Based Continuing Education Guidelines 28 November 2005. This evaluation will appear online at the end of each CME course. Participants must complete this evaluation in order to receive credit. Select the response which best indicates your reaction to the following statements about this activity.

**STATEMENT 1.** The activity achieved its stated objectives.

- 1. Strongly agree
- 2. Agree
- 3. Neutral
- 4. Disagree
- 5. Strongly disagree

**STATEMENT 2.** The activity was relevant to my practice.

- 1. Strongly agree
- 2. Agree
- 3. Neutral
- 4. Disagree
- 5. Strongly disagree

**STATEMENT 3.** I plan to change my current practice based on what I learned in the activity.

- 1. Strongly agree
- 2. Agree
- 3. Neutral
- 4. Disagree
- 5. Strongly disagree

**STATEMENT 4.** The activity validated my current practice.

- 1. Strongly agree
- 2. Agree
- 3. Neutral
- 4. Disagree
- 5. Strongly disagree

**STATEMENT 5.** The activity provided sufficient scientific evidence to support the content presented.

- 1. Strongly agree
- 2. Agree
- 3. Neutral
- 4. Disagree
- 5. Strongly disagree

**STATEMENT 6.** The activity was free of commercial bias toward a particular product or company.

- 1. Strongly agree
- 2. Agree
- 3. Neutral
- 4. Disagree
- 5. Strongly disagree

## Continuing Medical Education

Exams are available online only at [cme.psychiatryonline.org](http://cme.psychiatryonline.org)

### INFORMATION TO PARTICIPANTS

**OBJECTIVES.** After evaluating a specific journal article published in the American Journal of Psychiatry, participants should be able to demonstrate an increase in their knowledge of clinical medicine. Participants should be able to understand the contents of a selected research or review article and to apply the new findings to their clinical practice.

**PARTICIPANTS.** This program is designed for all psychiatrists in clinical practice, residents in Graduate Medical Education programs, medical students interested in psychiatry, and other physicians who wish to advance their current knowledge of clinical medicine.

**EXPLANATION OF HOW PHYSICIANS CAN PARTICIPATE AND EARN CREDIT.** In order to earn CME credit, subscribers should read through

the material presented in the article. After reading the article, complete the CME quiz online at [cme.psychiatryonline.org](http://cme.psychiatryonline.org) and submit your evaluation and study hours (up to 1 *AMA PRA Category 1 Credit*<sup>TM</sup>).

**CREDITS.** The APA designates this educational activity for a maximum of 1 *AMA PRA Category 1 Credit*<sup>TM</sup>. Physicians should only claim credit commensurate with the extent of their participation in the activity. The American Psychiatric Association (APA) is accredited by the Accreditation Council for Continuing Medical Education (ACCME) to provide continuing medical education (CME) for physicians.

**Estimated Time to Complete: 1 Hour**

Begin date November 1, 2008 – End date October 31, 2010

### EXAMINATION QUESTIONS

Select the single best answer for each question below.

#### Overcrowding in Hospital Wards as a Predictor of Antidepressant Treatment Among Hospital Staff

Marianna Virtanen et al.

Am J Psychiatry 2008; 165:1482–1486

**QUESTION 1.** This study demonstrated that patient overcrowding on hospital wards is associated with an increase in which of the following?

- A. Antidepressant use for patients on internal medicine wards.
- B. Antidepressant use among patients on all wards.
- C. Antidepressant use among hospital ward personnel.
- D. Antidepressant use among nurses only but not all personnel.

**QUESTION 2.** When excess bed occupancy was greater than 10%, which of the following reflects the likelihood of new antidepressant use among hospital personnel over a six-month period?

- A. 3-fold increase
- B. 1.7-fold increase
- C. 2-fold increase
- D. No increase

**QUESTION 3.** If employees with untreated depression were less productive and consequently the wards became overcrowded, this may potentially be a confounding bias in this study. Which of the following reflects this phenomenon?

- A. Item-response bias.
- B. Protopathic bias.
- C. Bias caused by non-participation.
- D. Measurement error in outcome.

### EVALUATION QUESTIONS

This evaluation form is adapted from the *MedBiquitous Journal-Based Continuing Education Guidelines* 28 November 2005.

This evaluation will appear online at the end of each CME course. Participants must complete this evaluation in order to receive credit. Select the response which best indicates your reaction to the following statements about this activity.

**STATEMENT 1.** The activity achieved its stated objectives.

- 1. Strongly agree
- 2. Agree
- 3. Neutral
- 4. Disagree
- 5. Strongly disagree

**STATEMENT 2.** The activity was relevant to my practice.

- 1. Strongly agree
- 2. Agree
- 3. Neutral
- 4. Disagree
- 5. Strongly disagree

**STATEMENT 3.** I plan to change my current practice based on what I learned in the activity.

- 1. Strongly agree
- 2. Agree
- 3. Neutral
- 4. Disagree
- 5. Strongly disagree

**STATEMENT 4.** The activity validated my current practice.

- 1. Strongly agree
- 2. Agree
- 3. Neutral
- 4. Disagree
- 5. Strongly disagree

**STATEMENT 5.** The activity provided sufficient scientific evidence to support the content presented.

- 1. Strongly agree
- 2. Agree
- 3. Neutral
- 4. Disagree
- 5. Strongly disagree

**STATEMENT 6.** The activity was free of commercial bias toward a particular product or company.

- 1. Strongly agree
- 2. Agree
- 3. Neutral
- 4. Disagree
- 5. Strongly disagree
