# THE AMERICAN JOURNAL OF PSYCHIATRY

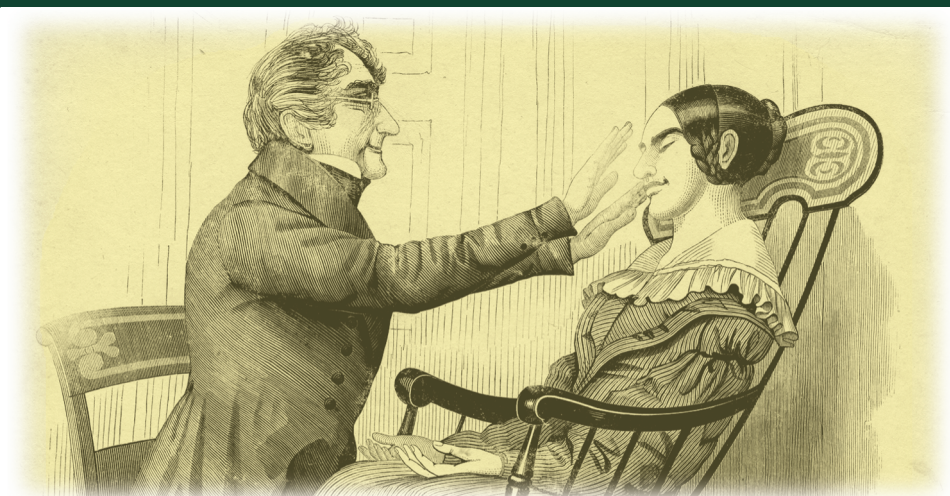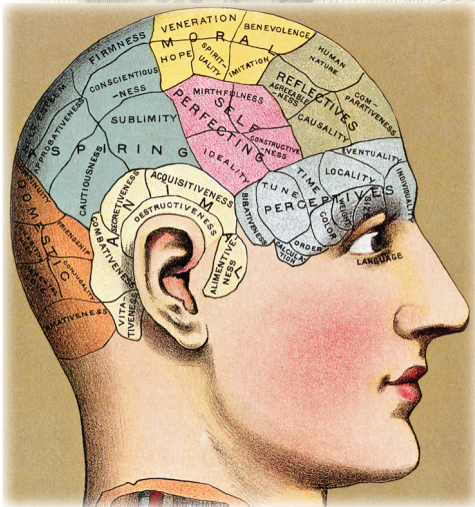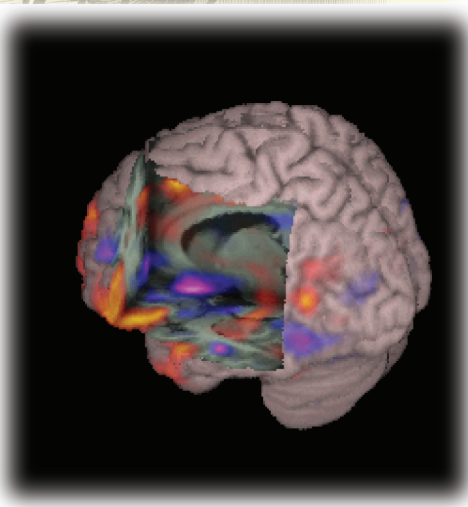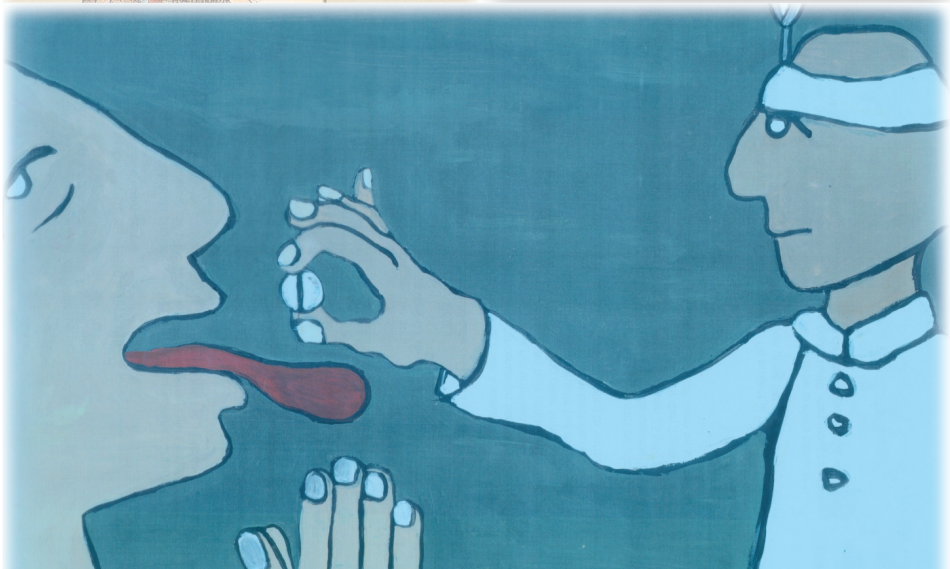

◀ **Teaching Critical Thinking in  
Psychiatric Training: A Role for  
the Social Sciences**

Elizabeth Bromley, M.D., Ph.D.  
and Joel T. Braslow, M.D., Ph.D.

1396

**Double-Blind Comparison of First-  
and Second-Generation Anti-  
psychotics in Early-Onset Schizo-  
phrenia and Schizo-affective  
Disorder: Findings From the  
Treatment of Early-Onset Schizo-  
phrenia Spectrum Disorders  
(TEOSS) Study**

Linmarie Sikich, M.D., et al.

1420

**Naltrexone for the Treatment of  
Amphetamine Dependence:  
A Randomized, Placebo-  
Controlled Trial**

Nitya Jayaram-Lindström, Ph.D., et al.

1442

**Refining the Construct of Narcis-  
sistic Personality Disorder: Diag-  
nostic Criteria and Subtypes**

Eric Russ, M.A., et al.

1473

**Continuing Medical Education**

1497

**November 2008**

**Volume 165 • Number 11**

Official Journal of the  
AMERICAN PSYCHIATRIC ASSOCIATION

[ajp.psychiatryonline.org](http://ajp.psychiatryonline.org)
