# Read *The American Journal of Psychiatry* Online

Activate your FREE online access—It's as easy as 1, 2, 3!

To begin activation, go to [ajp.psychiatryonline.org](http://ajp.psychiatryonline.org) and click **SUBSCRIBE**

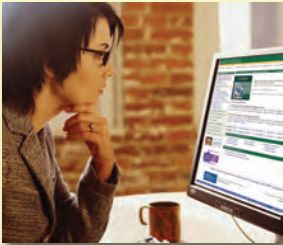

## For APA Members and Other Individuals:

1. Click on **ACTIVATE** Your Member or Individual (Non-Member) Subscription
2. Locate your 10-digit Member/Customer Number\* on your journal mailing label above your name. Be sure to enter all 10 digits, including any leading zeros.
3. Enter your number in the box and click **SUBMIT**.

On the next screen, you'll register your subscription and create a username and password that can be used immediately to access your online subscription.

\*If you are an APA Member, in most cases the number on your label will be your Member Number; if it is not, please enter your APA Member Number (with enough leading zeros to create 10 digits) instead of the number on your mailing label.

## For Institutions:

1. Click on **ACTIVATE** Your Institutional Subscription.
2. Locate your Customer Number on the journal mailing label above your name. Be sure to enter all 10-digits.
3. Enter your number in the box and click **SUBMIT**. On the next screen, you'll have the opportunity to enter IP addresses for your institution to provide seamless access for your patrons.

### Member/Customer Number

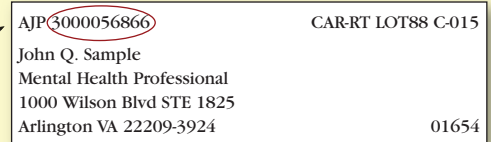

## Benefits of Online Activation

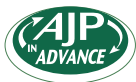

**AJP in Advance**—key research articles posted on the AJP website well in advance of their appearance in print.

**Back issue access to Volume 1, Issue 1**, starting with the *American Journal of Insanity* in 1844. (Available to institutions as a separate one-time purchase.)

**AJP CME**—interactive quizzes that offer *AMA PRA Category 1 Credits*<sup>™</sup> for selected articles from each issue (with paid subscription to the CME Course Program).

**AJP Audio**—MP3-format program summarizing findings from key articles from each issue.

**Residents' Journal**—the gateway to AJP articles and features that have most value to residents in their training.

**Precise and powerful searching** by author, keyword, and/or citation details—within any one journal, across the entire PsychiatryOnline journal collection, or across all HighWire journals.

**PubMed, CrossRef, and Google Scholar links**—from cited references to abstracts and full text; to similar articles; to other articles by the same lead authors.

**eTOCs**—Get advance email alerts with the table of contents from the latest issue.

For more information or if you cannot locate your customer number, please contact APPI Customer Service:  
Call: 1.800.368.5777 or 703.907.7322  
Email: [appi@psych.org](mailto:appi@psych.org)

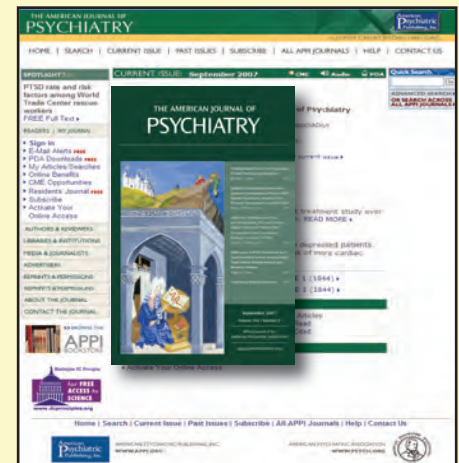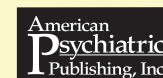

The First and Last Word in Psychiatry

AH810

# New Feature for Residents!

## *The American Journal of Psychiatry* Residents' Journal

A FREE electronic publication produced specifically for psychiatry residents

The Residents' Journal contains special links to full text of the articles from the current *American Journal of Psychiatry* and to AJP Audio, a downloadable MP3 file featuring highlights from the issue. In addition, this e-mail bulletin contains two exclusive features:

### Journal Club Kit

A featured article presented with an overview discussing the reasons for its selection, discussion questions, and an editorial by a senior member of the field placing the article into clinical context.

### Educational Article

Case presentation that illustrates a major point in clinical practice or highlights unique treatment approaches.

Plus lively contributions from your fellow residents:

- Instructive cases
- Unique clinical or educational programs
- Perspectives on training and career development
- Discussions arising from journal club discussions

The American Journal of Psychiatry and the Committee of Residents and Fellows  
**Residents' Journal**  
October 2008: Volume 3, Issue 10

**Global Mental Health: An International Perspective on Local Challenges**  
Nomi Levy-Catnick, M.D., M.Phil.  
Department of Psychiatry, New York University School of Medicine

The World Health Organization (WHO) will formally launch the Mental Health Gap Action Programme on Oct. 9, 2008, providing an action plan to "scale up services for mental, neurological and substance use disorders for countries especially with low and lower middle incomes...[by] building partnerships for collective action and...[ensuring] the commitment of governments, international organizations and other stakeholders" (1). It is thus an appropriate moment to consider what it means to express an interest in global mental health, particularly in the midst of residency training.

First, it signals an appreciation for the impact mental health has on communities and economies throughout the world. Neuropsychiatric disorders account for 12%-14% of the global burden of disease—second only to infectious disorders (23%), and more than AIDS, tuberculosis, and malaria combined (10%) (2). Estimates by WHO in 2002 suggest that 154 million people globally suffer from depression, while 25 million suffer from schizophrenia, 91 million from alcohol use disorders, and 15 million from drug use disorders. Another 50 million suffer from epilepsy and 24 million from Alzheimer's disease and other dementias (which accounts for many of the patients among the neuropsychiatric designation in these estimates). About 877,000 people die by suicide worldwide every year (3).

WHO highlights that "mental illnesses affect and are affected by chronic conditions such as cancer, heart and cardiovascular diseases, diabetes and HIV/AIDS. Untreated, they bring about unhealthy behavior, noncompliance with prescribed medical regimens, diminished immune functioning, and poor prognosis" (3). Put another way, there is "no health without mental health" (4). As physicians, we face the challenge of treating patients as people, addressing their mental health needs in the context of their overall health. This

interplay between medical and mental health care has also been emphasized in reports by Doctors Without Borders/Médecins Sans Frontières. "The integration of both physical and mental health messages in the communities [leads] to a better understanding of health and the relationship between physical and mental aspects in the community" (5). A nurturing model for various levels of psychosocial integration in primary health care settings has also been outlined and implemented in many operational programs (5).

The treatment gap between need and care is significant. As part of WHO's call for action, a recent Lower Global Health Network series was introduced focusing on global mental health, noting that "every year up to 30% of the population worldwide will suffer from some form of mental disorder, and at least two-thirds of those receive inadequate or no treatment, even in countries with the best resources" (6).

The Same and Not the Same

Global mental health programs have received serious international attention over the past decade. One of the starting points was the WHO International Consortium in Psychiatric Epidemiology in 1998, which shortly thereafter launched the WHO World Mental Health Survey Initiative. Also, Project Atlas was launched in 2000 to map mental health resources around the world, and its findings were published in the "Mental Health Atlas 2007" and again in 2008. These efforts document the variability in resources available both within and throughout the international community. The seeming absence of progress subsequent to the publication of these reports highlights the formidable challenges of translating policy statements into programmatic realities.

Moreover, recent studies have taken the venter off the notion that there is necessarily a better

**Contents**  
Global Mental Health: An International Perspective on Local Challenges  
Nomi Levy-Catnick  
Transcultural Reflections on the Stigma of Mental Illness in Pakistan  
Nauman Ashraf  
Bipolar Disorder as Culture-Bound Syndrome: A Book Review  
Helena Hansen  
Conducting Mental Health Research in Rwanda: A Resident's Experience  
Anna Yusim

1  
2  
3  
4

1

The Residents' Journal is sent free-of-charge to all psychiatry residents. Anyone interested in being included on the distribution list should contact Angela Moore, the Residents' Journal staff editor at [ajp@psych.org](mailto:ajp@psych.org) with "Subscribe to Residents' Journal" in the subject line.

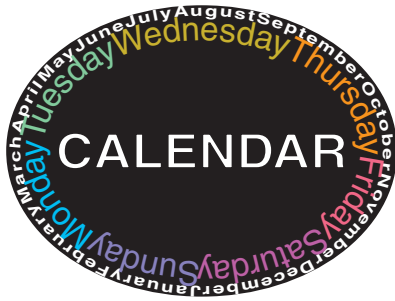

For free listing of your organization's official annual or regional meeting, please send us the following information: sponsor, location, inclusive dates, type and number of continuing education credits (if available), and the name, address, and telephone number of the person or group to contact for more information. In order for an event to appear in our listing, all notices and changes must be received at least 6 months in advance of the meeting and should be addressed to:

*Calendar, American Journal of Psychiatry, 1000 Wilson Boulevard, Suite 1825, Arlington, VA 22209-3901, jblair@psych.org (e-mail).*

*Because of space limitations, only listings of meetings of the greatest interest to Journal readers will be included.*

---

## NOVEMBER

**November 14–17**, Annual Conference of the International Society for the Study of Trauma and Dissociation, Chicago. Contact: Heidi Walker, Executive Director; [hwalker@amg-inc.com](mailto:hwalker@amg-inc.com) (e-mail), [isst-d.org](http://isst-d.org) (web site).

---

## FEBRUARY 2009

**February 18–22**, Annual Meeting of the American Neuropsychiatric Association (ANPA), San Antonio, TX. Contact: ANPA office; (614) 447-2077 (tel), (614) 263-4366 (fax), [anpa@osu.edu](mailto:anpa@osu.edu) (e-mail), [www.anpaonline.org](http://www.anpaonline.org) (web site).

**February 25–March 1**, American College of Psychiatrists Annual Meeting, Tucson, AZ. Contact: 122 South Michigan Avenue, Suite 1360, Chicago, IL 60603; (312) 662-1020 (tel), (312) 662-1025 (fax), [angel@ACPsych.org](mailto:angel@ACPsych.org) (e-mail).

---

## MARCH

**March 5–8**, 22nd Annual Meeting of the American Association for Geriatric Psychiatry, Honolulu. Contact: AAGP, 7910 Woodmont Ave., Ste. 1050, Bethesda, MD 20814-3004; (301) 654-7850 (tel), (301) 654-4137 (fax), [www.aagpmeeting.org](http://www.aagpmeeting.org) (web site).

**March 27–29**, 3rd International Conference of The International Society of Interpersonal Psychotherapy (ISIPT), New York City, NY. Contact: 2009 ISIPT

Planning Committee; [hv2009@columbia.edu](mailto:hv2009@columbia.edu) (e-mail).

---

## APRIL

**April 22–26**, Annual Meeting and Scientific Sessions of the Society of Behavioral Medicine, Montreal, Quebec. Contact: Society of Behavioral Medicine, (414) 918-3156 (tel), (414) 276-3349 (fax), [info@sbm.org](mailto:info@sbm.org) (e-mail).

---

## MAY

**May 15–17**, 5th International Conference on Alzheimer's Disease and Related Disorders in the Middle East, Limassol, Cyprus. Contact: Conference Secretariat; 1-773-784-8134 (tel), 1-773-782-6747 (tel), 1-208-575-5453 (fax), [meetings@worldeventsforum.com](mailto:meetings@worldeventsforum.com) (e-mail), [www.worldeventsforum.com/alz.htm](http://www.worldeventsforum.com/alz.htm) (web site).

**May 16–21**, 162nd Annual Meeting of the American Psychiatric Association, San Francisco, CA. Contact: Cathy Nash, APA Annual Meetings Dept., 1000 Wilson Blvd., Ste. 1825, Arlington, VA 22209; (703) 907-7822.

---

## JUNE

**June 16–20**, 2nd Thematic Conference on Legal and Forensic Psychiatry, Madrid, Spain. Contact: World Psychiatric Association, Alfredo Calcedo Barba, [forensicpsychiatry2009@gmail.com](mailto:forensicpsychiatry2009@gmail.com).

---

## AUGUST

**August 27–30**, Canadian Psychiatric Association 59th Annual Meeting, St. Johns, Newfoundland, Canada. Contact: 260-441 MacLaren Street, Ottawa, ON K2P 2H3, Canada; (800) 267-1555 (tel), (613) 234-9857 (fax), [conferene@cpa-apc.org](mailto:conferene@cpa-apc.org) (e-mail), [www.cpa-apc.org](http://www.cpa-apc.org) (web site).

---

## OCTOBER

**October 8–11**, 61st Institute on Psychiatric Services, American Psychiatric Association, New York, NY. Contact: Jill Gruber, APA Annual Meetings Dept., 1000 Wilson Blvd., Ste. 1825, Arlington, VA 22209; (703) 907-7815.

**October 27–November 1**, 56th Annual Meeting of the American Academy of Child and Adolescent Psychiatry, Honolulu, HI. Contact: AACAP, 3615 Wisconsin Avenue, N.W., Washington, DC 20016-3007; (202) 966-7300 (tel), (202) 966-2891 (fax), [meetings@aacap.org](mailto:meetings@aacap.org) (e-mail), [www.aacap.org](http://www.aacap.org) (web site).

---

## MAY 2010

**May 22–27**, 163rd Annual Meeting of the American Psychiatric Association, New Orleans, LA. Contact: Cathy Nash, APA Annual Meetings Dept., 1000 Wilson Blvd., Ste. 1825, Arlington, VA 22209; (703) 907-7822.

---

*Continued on page A44*

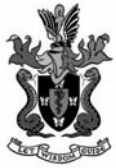

# THE BRITISH JOURNAL OF PSYCHIATRY

October 2008, VOL. 193

**A12 Editorial Board**

**A14 Highlights of this issue**

**Editorials**

**267 Melatonin and its agonists: an update**

J. Arendt and S.M.W. Rajaratnam

**270 Pros and cons of online cognitive-behavioural therapy**

G. Andersson and P. Cuijpers

**Review article**

**272 Relationship between gross domestic product and duration of untreated psychosis in low- and middle-income countries**

M. Large, S. Farooq, O. Nielssen, and T. Slade

**278 Untitled pictures by Denis Reed (1917-1979) – psychiatry in pictures**

C. Ramsey and P. Carpenter

**Papers**

**279 Extrapyramidal side-effects of antipsychotics in a randomised trial**

D.D. Miller, S.N. Caroff, S.M. Davis, R.A. Rosenheck, J.P. McEvoy, B.L. Saltz, S. Riggio, M.H. Chakos, M.S. Swartz, R.S.E. Keefe, T.S. Stroup and J.A. Lieberman, for the Clinical Antipsychotic Trials of Intervention Effectiveness (CATIE) Investigators

**289 Neurotoxic effects of ecstasy on the thalamus**

M.M. L. de Win, G. Jager, J. Booij, L. Reneman, T. Schilt, C. Lavini, S. D. Olabarriga, N.F. Ramsey, G.J. den Heeten, and W. van den Brink

**297 Cognitive markers of short-term clinical outcome in first-episode psychosis**

M. Bodnar, A. Malla, R. Joober, and M. Lepage

**305 Correlation and familial aggregation of dimensions of psychosis in affected sibling pairs from China**

E. Vassos, P.C. Sham, G. Cai, H. Deng, X. Liu, X. Sun, J. Zhao, R.M. Murray, D.A. Collier, and T. Li

**311 Schizophrenia and offspring's risk for adverse pregnancy outcomes and infant death**

E. Nilsson, C.M. Hultman, S. Cnattingius, P.O. Olausson, C. Björk, and P. Lichtenstein

**316 Paternal age at birth and high-functioning autistic-spectrum disorder in offspring**

K.J. Tsuchiya, K. Matsumoto, T. Miyachi, M. Tsujii, K. Nakamura, S. Takagai, M. Kawai, A. Yagi, K. Iwaki, S.

Suda, G. Sugihara, Y. Iwata, H. Matsuzaki, Y. Sekine, K. Suzuki, T. Sugiyama, N. Mori, and N. Takei

**321 Autism – in 100 words**

S. Baron-Cohen

**322 Tobacco smoking as a risk factor for major depressive disorder: population-based study**

J.A. Pasco, L.J. Williams, F.N. Jacka, F. Ng, M.J. Henry, G.C. Nicholson, M.A. Kotowicz, and M. Berk

**327 Psychiatric outcomes 10 years after treatment with antidepressants or anxiolytics**

I. Colman, T.J. Croudace, M.E. Wadsworth, D. Kuh, and P.B. Jones

**331 Rapunzel – poems by doctors**

J.D. Eubanks

**332 Cognitive-behavioural therapy for health anxiety in a genitourinary medicine clinic: randomised controlled trial**

H. Seivewright, J. Green, P. Salkovskis, B. Barrett, U. Nur, and P. Tyrer

**337 Lost in translation: the biblical classification of personality disorder – psychiatry in the Old Testament**

G. Stein

**Short reports**

**338 Serum levels of P-selectin in men with high-functioning autism**

Y. Iwata, K.J. Tsuchiya, S. Mikawa, K. Nakamura, Y. Takai, S. Suda, Y. Sekine, K. Suzuki, M. Kawai, G. Sugihara, H. Matsuzaki, K. Hashimoto, M. Tsujii, T. Sugiyama, N. Takei, and N. Mori

**340 Guided self-instructions for people with chronic fatigue syndrome: randomised controlled trial**

H. Knoop, J.W.M. van der Meer, and G. Bleijenberg

**342 Dedicated community-based services for adults with personality disorder: Delphi study**

M.J. Crawford, K. Price, D. Rutter, P. Moran, P. Tyrer, A. Bateman, P. Fonagy, S. Gibson, and T. Weaver

**Columns**

**344 Correspondence**

**346 Corrections**

**347 Book reviews**

**348 Contents of *Advances in Psychiatric Treatment***

**349 Contents of the *American Journal of Psychiatry***

**350 From the Editor's desk**

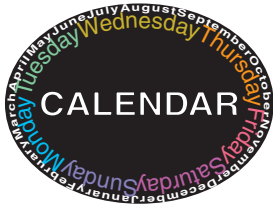

Continued from page A36

## OCTOBER

**Oct 14–17**, 57th Annual Meeting of the American Academy of Child and Adolescent Psychiatry, Boston, MA. Contact: AACAP, 3615 Wisconsin Avenue, N.W., Washington, DC 20016-3007; (202) 966-7300 (tel), (202) 966-2891 (fax), meetings@aacap.org (e-mail), www.aacap.org (web site).

**FREE AUDIO! Have You Heard?**

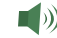

You can listen to highlights of *The American Journal of Psychiatry* by downloading a monthly free .mp3 audio file from our website (<http://ajp.psychiatryonline.org/misc/audio.dtl>) or by subscribing to the AJP Audio podcast at iTunes or other feed reader.

### Continuing Medical Education

Three articles in each issue provide an opportunity to earn up to 1 hour category 1 **CME** credit each by taking a course covering the content. Credit available online only with purchased subscription to AJP's CME program. Visit [cme.psychiatryonline.org](http://cme.psychiatryonline.org) for details.

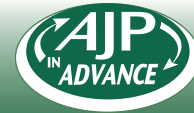

### GET AHEAD!

Subscribers can now view PDFs of all new research articles before print publication by clicking on the "AJP in Advance" logo at the AJP website ([ajp.psychiatryonline.org](http://ajp.psychiatryonline.org)).

## Coming in the December 2008 issue\*

### THE AMERICAN JOURNAL OF PSYCHIATRY

#### *Sleep Disturbance and Depression Recurrence in Community-Dwelling Older Adults: A Prospective Study*

H.J. Cho, H. Lavretsky, R. Olmstead, M.J. Levin, M.N. Oxman, and M.R. Irwin

#### *Plasma Melatonin Circadian Rhythm Disturbances During Pregnancy and Postpartum in Depressed Women and Women With Personal or Family Histories of Depression*

B.L. Parry, C.J. Meliska, D.L. Sorenson, A.M. Lopez, L.F. Martinez, S. Nowakowski, J.A. Elliott, R.L. Hauger, and D.F. Kripke

#### *The Role of Interpersonal and Social Rhythm Therapy in Improving Occupational Functioning in Patients With Bipolar I Disorder*

E. Frank, I. Soreca, H.A. Swartz, A.M. Fagiolini, A.G. Mallinger, M.E. Thase, V.J. Grochocinski, P.R. Houck, and D.J. Kupfer

#### *Trauma, Resilience, and Recovery in a High-Risk African-American Population*

T.N. Alim, A. Feder, R.E. Graves, Y. Wang, J. Weaver, M. Westphal, A. Alonso, N.U. Aigbogun, B.W. Smith, J.T. Doucette, T.A. Mellman, W.B. Lawson, and D.S. Charney

\*Can't wait? Visit [ajp.psychiatryonline.org](http://ajp.psychiatryonline.org) and click the "AJP in Advance" logo to see all articles uploaded in advance of print!
